# Supplementary material for: Sensitivity of Human Papillomavirus (HPV) Lineage and Sublineage Variant Pseudoviruses to Neutralization by Nonavalent Vaccine Antibodies
Source: PubMed Central journal article supplement (PMC6834066; doi:10.1093/infdis/jiz401), 2019-08-14
Supplement: jiz401_suppl_supplementary_figure_1.pdf [file jiz401_suppl_supplementary_figure_1.pdf]

HPV16

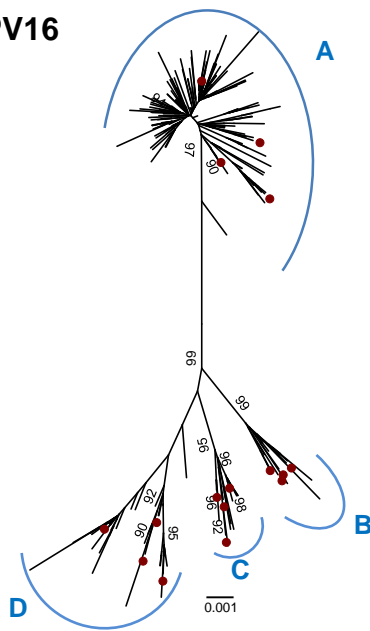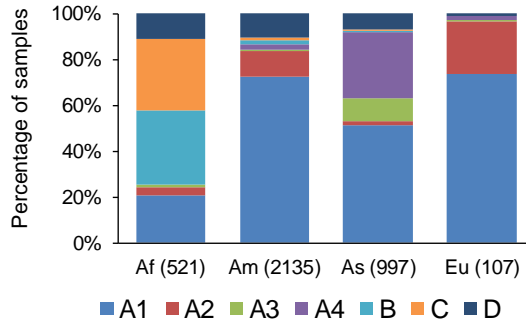

| L2       |          |          |          |          |          |          |          |          |          |          |          |          | L1       |          |          |          |          | n   |
|----------|----------|----------|----------|----------|----------|----------|----------|----------|----------|----------|----------|----------|----------|----------|----------|----------|----------|-----|
| 122      | 245      | 266      | 269      | 330      | 352      | 378      | 384      | 385      | 420      | 424      | 443      | 76       | 176      | 181      | 282      | 474      |          |     |
| <b>A</b> | <b>S</b> | <b>T</b> | <b>L</b> | <b>S</b> | <b>F</b> | <b>T</b> | <b>S</b> | <b>S</b> | <b>V</b> | <b>I</b> | <b>A</b> | <b>A</b> | <b>H</b> | <b>T</b> | <b>N</b> | <b>S</b> | <b>L</b> | 388 |
| <b>B</b> | <b>P</b> | .        | .        | <b>P</b> | <b>L</b> | <b>A</b> | .        | .        | <b>I</b> | <b>T</b> | <b>T</b> | <b>G</b> | <b>Y</b> | <b>N</b> | .        | .        | <b>F</b> | 20  |
| <b>C</b> | <b>P</b> | .        | .        | <b>P</b> | <b>L</b> | <b>P</b> | <b>F</b> | .        | <b>I</b> | <b>T</b> | <b>T</b> | <b>G</b> | <b>Y</b> | <b>N</b> | <b>T</b> | <b>P</b> | <b>F</b> | 31  |
| <b>D</b> | <b>P</b> | <b>A</b> | <b>F</b> | <b>P</b> | <b>L</b> | .        | <b>V</b> | <b>A</b> | <b>I</b> | <b>T</b> | <b>T</b> | <b>G</b> | <b>Y</b> | <b>N</b> | <b>T</b> | .        | <b>F</b> | 62  |

|                           |                                                                                                                                                                                                                                                                                                                                                                                                             |
|---------------------------|-------------------------------------------------------------------------------------------------------------------------------------------------------------------------------------------------------------------------------------------------------------------------------------------------------------------------------------------------------------------------------------------------------------|
| <b>Accession numbers</b>  | NC001526; AB818687-93; AB889488-94; AF125673; AF402678; AF472508-9; AF534061; AF536179-80; AY686579-84; EU11817; EU918764; FJ006723; FJ610146-52; HM057182; HQ644234-299; JN565302-3; JQ004092-99; JQ067943-44; KC935953; KF880690; KF954093; KP212150-59; KP874716-19; KU053823-944; KU298880-85; KU641509; KU684311-14; KU684316-17; KX947269-85; KY549156-321; KY883659; KY994539; LC193821; LC368952-97 |
| <b>Lineage References</b> | A1 (NC001526); A2 (AF536179); A3 (HQ644236); A4 (AF534061); B1 (AF536180); B2 (HQ644298); B3 (KU053910); B4 (KU053914); C1 (AF472509); C2 (HQ644644); C3 (KU053921); C4 (KU053922), D1 (HQ644257); D2 (AY686579); D3 (AF402678); D4 (KU053933)                                                                                                                                                              |
| <b>L1L2 consensus</b>     | Consensus HPV16 A and PsV sequences have an Ala at residue 266 in L1 compared to a Thr in the genome reference (NC001526). In addition, HPV16 A has a Phe at residue 330 in L2 compared to a Leu in the HPV16 PsV and NC001526 sequences. HPV16 A had similar sensitivity to nonavalent sera (median 0.97; IQR 0.80-1.04; n=10; p=0.114) as HPV16 PsV.                                                      |
| <b>Global reference</b>   | Clifford et al, Papillomavirus Res. 2019; 7:67-74                                                                                                                                                                                                                                                                                                                                                           |

HPV18

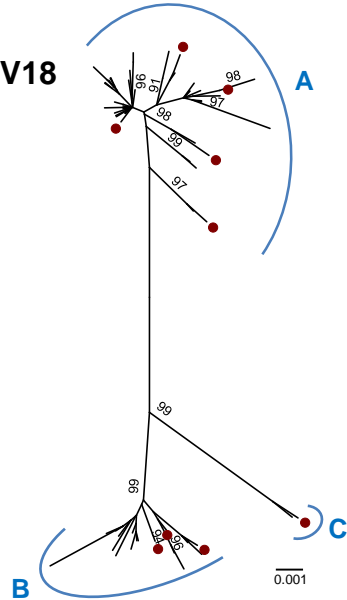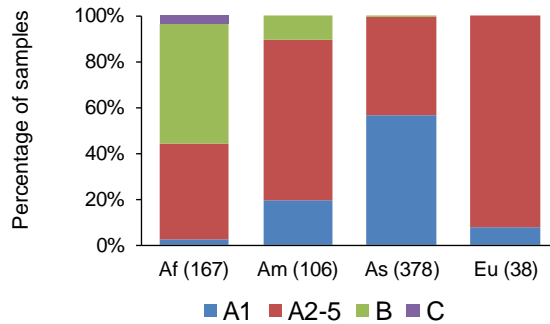

| L2       |          |          |          |          |          |          |          |          |          |          |          |          | L1       |          |          |          |          | n        |          |          |    |
|----------|----------|----------|----------|----------|----------|----------|----------|----------|----------|----------|----------|----------|----------|----------|----------|----------|----------|----------|----------|----------|----|
| 29       | 33       | 259      | 266      | 270      | 328      | 346      | 355      | 359      | 365      | 369      | 370      | 371      | 373      | 459      | 3        | 9        | 51       |          | 90       | 323      |    |
| <b>A</b> | <b>P</b> | <b>P</b> | <b>V</b> | <b>D</b> | <b>D</b> | <b>P</b> | <b>D</b> | <b>I</b> | <b>V</b> | <b>S</b> | <b>F</b> | <b>A</b> | <b>F</b> | <b>K</b> | <b>Y</b> | <b>M</b> | <b>N</b> | <b>R</b> | <b>I</b> | <b>V</b> | 71 |
| <b>B</b> | <b>S</b> | <b>N</b> | <b>M</b> | <b>E</b> | <b>N</b> | .        | <b>G</b> | .        | <b>L</b> | <b>P</b> | <b>S</b> | .        | <b>V</b> | <b>T</b> | <b>F</b> | <b>L</b> | .        | .        | .        | <b>I</b> | 25 |
| <b>C</b> | <b>S</b> | <b>N</b> | .        | <b>E</b> | .        | <b>T</b> | .        | .        | <b>L</b> | <b>P</b> | <b>S</b> | <b>T</b> | <b>L</b> | .        | <b>F</b> | <b>L</b> | <b>S</b> | <b>K</b> | <b>V</b> | <b>I</b> | 2  |

|                           |                                                                                                                                                                                                                                                                                                                                                                                                                                                                                                                                                                                                  |
|---------------------------|--------------------------------------------------------------------------------------------------------------------------------------------------------------------------------------------------------------------------------------------------------------------------------------------------------------------------------------------------------------------------------------------------------------------------------------------------------------------------------------------------------------------------------------------------------------------------------------------------|
| <b>Accession numbers</b>  | NC_00135; X05015; AY262282; EF202143-55; GQ180784-85; GQ180887-08; GQ180792 KC470208-30; KU298886; KX514433; MF288652; MF288654; MF288656-58; MF288660; MF288662-65; MF288667-70; MF288672; MF288674; MF288677; MF288679-8; OMF288682-85; MF288687-99; MF288703-05; MF288708; MF288710; MF288712-3; MF288715; MF288717; MF288720-3; MF288726-7                                                                                                                                                                                                                                                   |
| <b>Lineage References</b> | A1 (AY262282); A2 (EF202146); A3 (EF202147); A4 (EF202151); A5 (GQ180787); B1 (EF202155); B2 (KC470225); B3 (EF202152); C (KC470229)                                                                                                                                                                                                                                                                                                                                                                                                                                                             |
| <b>L1L2 consensus</b>     | Consensus HPV18 A has a Ser at residue 177, an Ile at residue 355, a Ser at residue 372 and a Tyr at residue 459 in L2 compared to an Ala, a Met and two Phe in the HPV18 PsV and in the genome reference (X05015) sequences. HPV18 A and PsV sequences have a Arg at residues 30, 283 and 338 in L1 compared to a Pro in the X05015 sequence. In addition, HPV18 A has a Met at residue 3 and an Asn at residue 88, compared to Leu and a Thr in the PsV and X05015 sequences. HPV18 A had reduced (0.41; 0.38 – 0.49; n=10; p=005) sensitivity to nonavalent antibodies compared to HPV18 PsV. |
| <b>Global reference</b>   | Chen et al., J. Virol. 2015; 89:10680-10687                                                                                                                                                                                                                                                                                                                                                                                                                                                                                                                                                      |

## HPV31

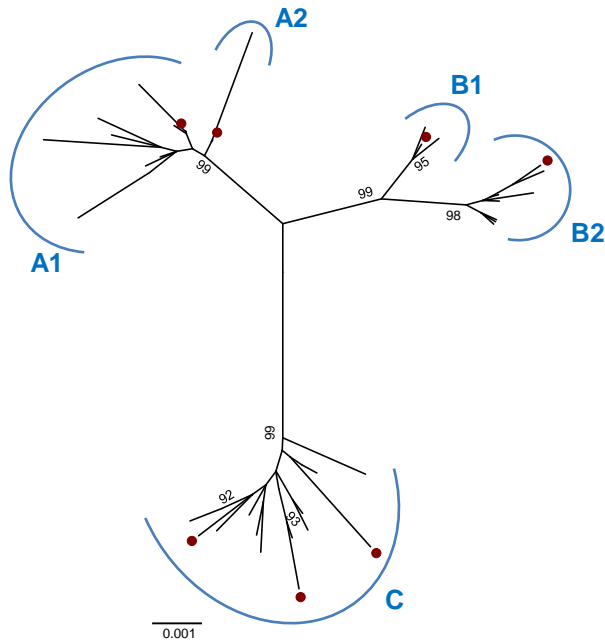

|    | L2  |     |     |     | L1  |     |     |     |          |
|----|-----|-----|-----|-----|-----|-----|-----|-----|----------|
|    | 115 | 260 | 270 | 377 | 194 | 267 | 274 | 432 | <i>n</i> |
| A1 | V   | S   | I   | V   | S   | T   | T   | S   | 15       |
| A2 | .   | T   | .   | .   | .   | .   | .   | T   | 2        |
| B1 | .   | .   | .   | .   | T   | .   | N   | T   | 4        |
| B2 | .   | .   | .   | .   | .   | .   | N   | T   | 10       |
| C  | I   | .   | M   | L   | .   | A   | N   | T   | 18       |

|                           |                                                                                                                                                                                                                                 |
|---------------------------|---------------------------------------------------------------------------------------------------------------------------------------------------------------------------------------------------------------------------------|
| <b>Accession numbers</b>  | J04353; KX638481; KX514430; KX514424; KU298888-90; KJ754561-80; HQ537666-87                                                                                                                                                     |
| <b>Lineage References</b> | A1 (J04353); A2 (HQ537675); B1 (HQ537676); HQ537680; C1 (HQ537682); C2 (HQ537684); C3 (HQ537685)                                                                                                                                |
| <b>L1L2 consensus</b>     | Consensus HPV31 A1 has a Ser at residue 432 in L1 compared to a Thr in the genome reference (J04353) and HPV31 PsV sequences. HPV31 A1 had similar sensitivity to nonvalent sera (1.01; 0.80-1.10; n=10; p=0.959) as HPV31 PsV. |
| <b>Global reference</b>   | Limited geographical distribution data available, insufficient to plot                                                                                                                                                          |

## HPV33

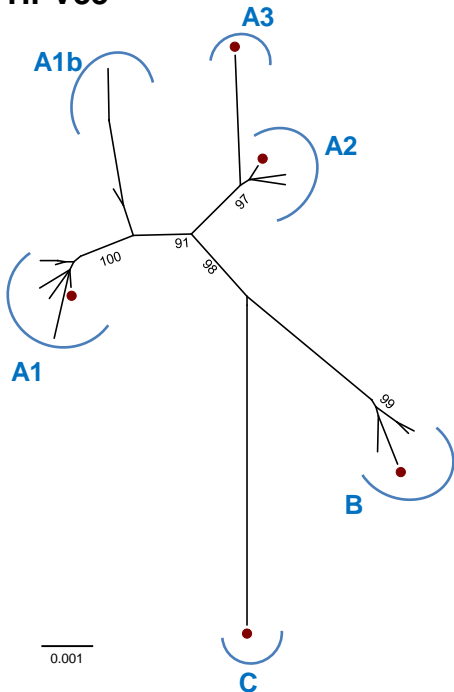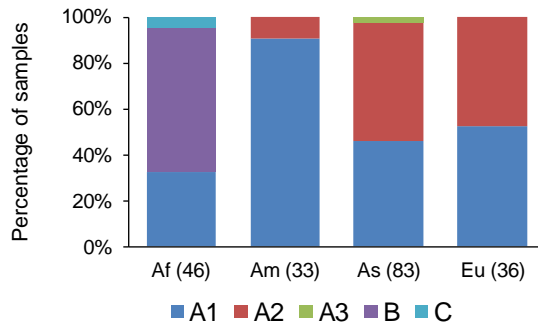

|     | L2 |    |     |     |     |     |     |     |     |     | L1  |    |    |     |     |     |     |     |     |     |     |     |     |          |
|-----|----|----|-----|-----|-----|-----|-----|-----|-----|-----|-----|----|----|-----|-----|-----|-----|-----|-----|-----|-----|-----|-----|----------|
|     | 74 | 77 | 112 | 131 | 172 | 195 | 336 | 350 | 355 | 360 | 372 | 31 | 56 | 133 | 135 | 266 | 268 | 357 | 385 | 392 | 396 | 433 | 495 | <i>n</i> |
| A1  | I  | D  | S   | V   | P   | N   | H   | D   | D   | N   | T   | T  | G  | K   | T   | G   | E   | E   | A   | D   | P   | K   |     | 10       |
| A1b | .  | N  | .   | .   | .   | .   | N   | .   | .   | .   | .   | .  | .  | .   | R   | K   | E   | .   | .   | .   | .   | .   | .   | 3        |
| A2  | .  | N  | .   | .   | .   | .   | H   | .   | N   | T   | .   | N  | S  | .   | K   | .   | .   | .   | .   | .   | .   | .   | .   | 4        |
| A3  | .  | T  | .   | .   | .   | R   | H   | .   | N   | T   | A   | N  | S  | .   | K   | .   | D   | .   | G   | .   | .   | .   | 1   |          |
| B   | .  | N  | I   | .   | .   | .   | H   | .   | T   | .   | N   | S  | .  | K   | .   | .   | .   | .   | .   | .   | .   | R   | .   | 6        |
| C   | L  | N  | G   | .   | S   | H   | H   | .   | T   | .   | N   | S  | .  | K   | .   | D   | .   | T   | .   | A   | .   | .   | 1   |          |

|                           |                                                                                                  |
|---------------------------|--------------------------------------------------------------------------------------------------|
| <b>Accession numbers</b>  | M12732; KU298891-92; EU918766; HQ537688-707; KF436865                                            |
| <b>Lineage References</b> | A1 (M12732); A2 (HQ537698); A3 (EU918766); B (HQ537705); C (KF436865)                            |
| <b>L1L2 consensus</b>     | Consensus HPV33 A1, genome reference (M12732), and HPV33 PsV sequences share amino acid identity |
| <b>Global reference</b>   | Chen et al., Virology. 2014; 448:356-362                                                         |

## HPV45

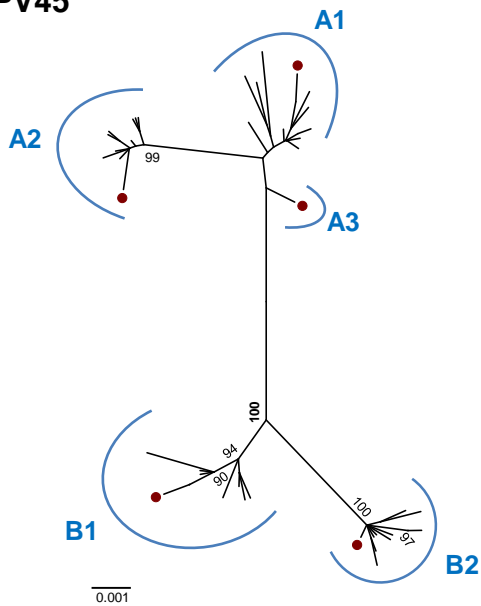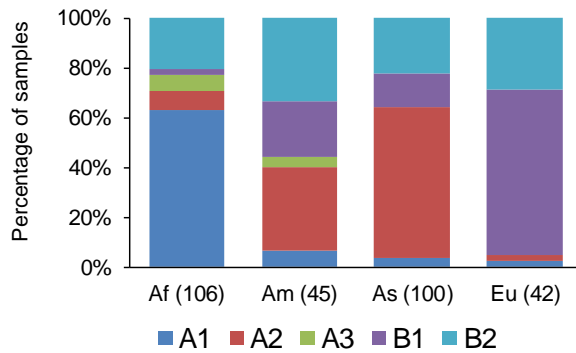

|    | L2 |    |     |     |     |     |     |     |     |    | L1  |     |     |     |     |     |     |    |  |  | n |
|----|----|----|-----|-----|-----|-----|-----|-----|-----|----|-----|-----|-----|-----|-----|-----|-----|----|--|--|---|
|    | 19 | 43 | 109 | 114 | 240 | 244 | 338 | 424 | 426 | 55 | 140 | 303 | 357 | 366 | 495 | 496 | 497 |    |  |  |   |
| A1 | R  | K  | D   | A   | Q   | H   | I   | S   | T   | N  | I   | I   | S   | Q   | S   | T   | A   | 15 |  |  |   |
| A2 | .  | .  | .   | .   | .   | .   | .   | .   | .   | .  | .   | .   | G   | .   | .   | .   | .   | 16 |  |  |   |
| A3 | K  | .  | .   | .   | .   | .   | .   | .   | .   | .  | .   | G   | .   | .   | .   | .   | .   | 1  |  |  |   |
| B1 | K  | .  | E   | .   | R   | R   | L   | .   | S   | S  | V   | .   | G   | H   | .   | .   | .   | 12 |  |  |   |
| B2 | K  | R  | E   | S   | .   | R   | L   | A   | S   | S  | .   | T   | N   | H   | .   | .   | .   | 16 |  |  |   |

|                           |                                                                                                                                                                                                                                                                                                                                                                                                                                                                 |
|---------------------------|-----------------------------------------------------------------------------------------------------------------------------------------------------------------------------------------------------------------------------------------------------------------------------------------------------------------------------------------------------------------------------------------------------------------------------------------------------------------|
| <b>Accession numbers</b>  | X74479; DQ080002; EF202156-77; KC470250-60; KU049723-57                                                                                                                                                                                                                                                                                                                                                                                                         |
| <b>Lineage References</b> | A1 (X74479); A2 (EF202157); A3 (KC470256); B1 (EF202161); B2 (EF202164)                                                                                                                                                                                                                                                                                                                                                                                         |
| <b>L1L2 consensus</b>     | Consensus HPV45 A1 and PsV have an Ala at residue 222 in L2 compared to Arg in genome reference (X74479) sequence. In addition, HPV45 A1 has a Asp at residue 342 and an Asn at residue 365 compared to a Asn and a His in the HPV45 PsV and X74479 sequences. HPV45 A1 has an Asn at position 23 in L1 compared to Ser in the HPV45 PsV and X74479 sequences. HPV45 A1 had similar sensitivity to nonvalent sera (0.94; 0.87-1.01; n=10; p=0.333) as HPV45 PsV |
| <b>Global reference</b>   | Chen et al., J. Virol. 2014, 88:4514-4521                                                                                                                                                                                                                                                                                                                                                                                                                       |

## HPV52

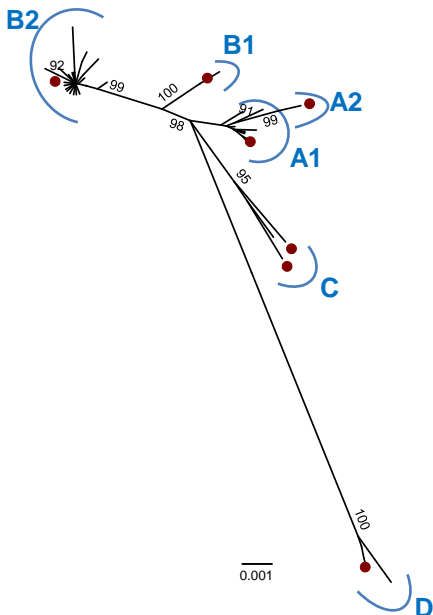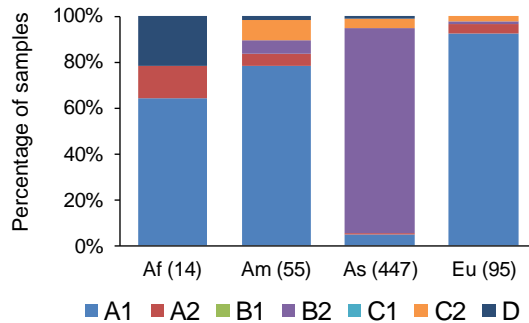

|    | L2  |     |     |     |     |     |     | L1  |     |     |     |     | n  |
|----|-----|-----|-----|-----|-----|-----|-----|-----|-----|-----|-----|-----|----|
|    | 122 | 169 | 247 | 272 | 273 | 274 | 365 | 281 | 354 | 357 | 360 | 447 |    |
| A1 | S   | I   | Q   | Q   | L   | L   | D   | Q   | K   | S   | K   | D   | 14 |
| A2 | .   | .   | .   | .   | .   | S   | .   | .   | .   | .   | .   | .   | 2  |
| B1 | .   | .   | .   | .   | .   | S   | .   | .   | .   | .   | N   | .   | 2  |
| B2 | .   | .   | .   | .   | .   | .   | E   | .   | .   | .   | .   | .   | 59 |
| C  | .   | L   | .   | .   | .   | .   | .   | .   | .   | .   | .   | .   | 3  |
| D  | T   | .   | H   | E   | H   | .   | .   | K   | T   | D   | .   | E   | 5  |

|                           |                                                                                                         |
|---------------------------|---------------------------------------------------------------------------------------------------------|
| <b>Accession numbers</b>  | X74481; AB819272-74; GQ472848; HQ537731-51; KU298906; KU298908-10; LC270024-38; LC270040-75; LC373204-7 |
| <b>Lineage References</b> | A1 (X74481); A2 (HQ537739); B1 (HQ537740); B2 (HQ537743); C1 (HQ537744); C2 (HQ537746); D (HQ537748)    |
| <b>L1L2 consensus</b>     | Consensus HPV52 A1, genome reference (X74481), and HPV52 PsV sequences share amino acid identity        |
| <b>Global reference</b>   | Zhang et al., J Infect Dis. 2014; 210:1600-1604                                                         |

# HPV58

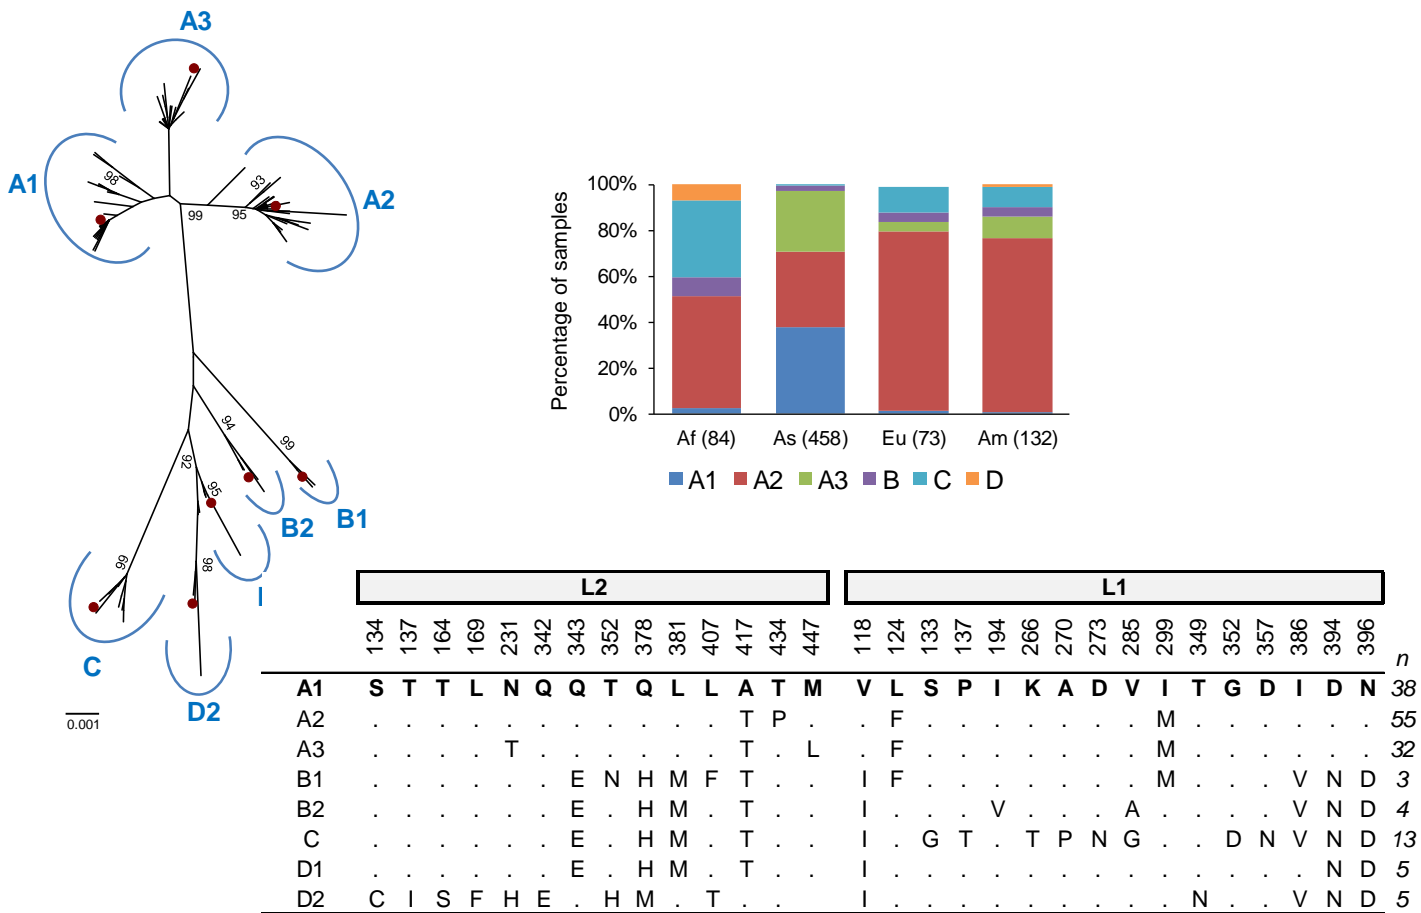

|                           |                                                                                                                                                                                          |
|---------------------------|------------------------------------------------------------------------------------------------------------------------------------------------------------------------------------------|
| <b>Accession numbers</b>  | D90400; AB819275-79; EU918765; FJ385261-68; FJ407192; FJ407194-5; FJ407199-201; GQ472850; HQ537752-77; KC860269-71; KU298920; KX514422; KY225918-67; LC270076-123; LC373208-10; LC376008 |
| <b>Lineage References</b> | A1 (D90400); A2 (HQ537752); A3 (HQ537758); B1 (HQ537762); B2 (HQ537764); C (HQ537774); D1 (HQ537768); D2 (HQ537770)                                                                      |
| <b>L1L2 consensus</b>     | Consensus HPV58 A1, genome reference (D90400), and HPV58 PsV sequences share amino acid identity                                                                                         |
| <b>Global reference</b>   | Chen et al., J Virol 2017 91(21) e01285-17                                                                                                                                               |

**Supplementary Figure 1. Variant sequences and creation of representative pseudoviruses**  
 Left panel, radial Neighbor Joining tree (500 bootstrap iterations, 90% threshold) with lineage or sublineages branches indicated and appropriate representative lineage sequences highlighted (Burk et al. 2013). Right panel, geographic distribution of lineage and, where resolved, sublineage variants across four global regions (Af, Africa; Am, Americas; As, Asia; Eu, Europe) and consensus lineage and sublineage L1L2 variant sequences used for creation of representative PsV. Bottom panel, list of accession numbers used in this evaluation including differences between the genome reference, the commonly used PsV sequence and the representative consensus A/A1 used in this study. All sequences were extracted from existing sequences within the National Center for Biotechnology Information ([www.ncbi.nlm.nih.gov/](http://www.ncbi.nlm.nih.gov/)) database.

Burk, R. D., A. Harari and Z. Chen (2013). Human papillomavirus genome variants. *Virology* 445:232-243.
