# Supplementary material for: Sensitivity of Human Papillomavirus (HPV) Lineage and Sublineage Variant Pseudoviruses to Neutralization by Nonavalent Vaccine Antibodies
Source: PubMed Central journal article supplement (PMC6834066; doi:10.1093/infdis/jiz401), 2019-08-14
Supplement: jiz401_suppl_supplementary_table_1.pdf [file jiz401_suppl_supplementary_table_1.pdf]

**Supplementary Table 1.** Donor characteristics

| Characteristic       | Measure           | Outcome      |
|----------------------|-------------------|--------------|
| Gender (n, %)        | Male              | 11 (61%)     |
|                      | Female            | 7 (39%)      |
| Ethnicity (n, %)     | White             | 10 (56%)     |
|                      | Black             | 4 (22%)      |
|                      | Mixed/Hispanic    | 2 (11%)      |
|                      | Asian             | 1 (6%)       |
|                      | N/A               | 1 (6%)       |
| Age (Years)          | Median (IQR)      | 14 (12 – 17) |
|                      | Range (Min – Max) | 11 – 27      |
| Vaccine doses (n, %) | 1                 | 3 (17%)      |
|                      | 2                 | 7 (39%)      |
|                      | 3                 | 8 (44%)      |

*IQR, inter-quartile range; N/A, data not available*
