# Supplementary material for: Sensitivity of Human Papillomavirus (HPV) Lineage and Sublineage Variant Pseudoviruses to Neutralization by Nonavalent Vaccine Antibodies
Source: PubMed Central journal article supplement (PMC6834066; doi:10.1093/infdis/jiz401), 2019-08-14
Supplement: jiz401_suppl_supplementary_table_2.pdf [file jiz401_suppl_supplementary_table_2.pdf]

**Supplementary Table 2. Neutralizing antibody titers and fold difference from reference for lineage and sublineage PsV variants**

| Species        | Type | Variants | Neutralizing titer* |       |        | Fold difference from A/A1 reference† |      |      | Direction | p value          |
|----------------|------|----------|---------------------|-------|--------|--------------------------------------|------|------|-----------|------------------|
|                |      |          | Median              | Q1    | Q3     | Median                               | Q1   | Q3   |           |                  |
| <i>Alpha-9</i> | 16   | A        | 9,508               | 4,702 | 51,160 |                                      |      |      |           |                  |
|                |      | B        | 5,279               | 3,528 | 37,922 | 0.69                                 | 0.53 | 0.85 | ↓         | <b>&lt;0.001</b> |
|                |      | C        | 4,312               | 1,874 | 34,678 | 0.61                                 | 0.38 | 0.82 | ↓         | <b>&lt;0.001</b> |
|                |      | D        | 3,048               | 1,806 | 30,833 | 0.64                                 | 0.24 | 0.86 | ↓         | <b>0.002</b>     |
|                | 31   | A1       | 4,345               | 1,661 | 13,976 |                                      |      |      |           |                  |
|                |      | A2       | 4,393               | 2,174 | 13,201 | 0.93                                 | 0.70 | 1.27 | -         | 0.267            |
|                |      | B1       | 5,012               | 2,523 | 16,324 | 1.09                                 | 0.82 | 1.39 | -         | 0.913            |
|                |      | B2       | 4,326               | 3,140 | 14,441 | 1.02                                 | 0.71 | 1.29 | -         | 0.617            |
|                |      | C        | 4,719               | 3,154 | 14,219 | 1.13                                 | 0.89 | 1.61 | -         | 0.679            |
|                | 33   | A1       | 5,668               | 3,077 | 15,920 |                                      |      |      |           |                  |
|                |      | A1b      | 2,839               | 1,083 | 10,912 | 0.44                                 | 0.37 | 0.54 | ↓↓        | <b>&lt;0.001</b> |
|                |      | A2       | 2,446               | 737   | 11,334 | 0.34                                 | 0.25 | 0.43 | ↓↓        | <b>&lt;0.001</b> |
|                |      | A3       | 1,771               | 568   | 11,619 | 0.32                                 | 0.23 | 0.37 | ↓↓        | <b>&lt;0.001</b> |
|                |      | B        | 2,091               | 805   | 9,710  | 0.28                                 | 0.22 | 0.35 | ↓↓        | <b>&lt;0.001</b> |
|                |      | C        | 2,619               | 661   | 12,241 | 0.32                                 | 0.24 | 0.41 | ↓↓        | <b>&lt;0.001</b> |
|                | 52   | A1       | 11,945              | 4,425 | 48,402 |                                      |      |      |           |                  |
|                |      | A2       | 7,270               | 2,525 | 53,139 | 0.85                                 | 0.55 | 0.91 | ↓         | <b>0.039</b>     |
|                |      | B1       | 4,690               | 2,065 | 41,095 | 0.64                                 | 0.52 | 0.86 | ↓         | <b>0.001</b>     |
|                |      | B2       | 10,076              | 3,614 | 57,483 | 1.02                                 | 0.81 | 1.17 | -         | 0.983            |
|                |      | C        | 8,248               | 3,441 | 46,922 | 0.77                                 | 0.62 | 0.98 | ↓         | <b>0.031</b>     |
|                |      | D        | 1,859               | 660   | 16,091 | 0.23                                 | 0.15 | 0.46 | ↓↓↓       | <b>&lt;0.001</b> |
|                | 58   | A1       | 5,090               | 1,760 | 12,795 |                                      |      |      |           |                  |
|                |      | A2       | 7,433               | 1,887 | 13,364 | 1.16                                 | 0.97 | 1.35 | -         | 0.170            |
|                |      | A3       | 5,673               | 2,186 | 13,614 | 1.31                                 | 1.03 | 1.66 | ↑         | <b>0.035</b>     |
|                |      | B1       | 4,400               | 1,703 | 14,774 | 0.98                                 | 0.77 | 1.18 | -         | 0.396            |
|                |      | B2       | 4,224               | 2,352 | 11,538 | 1.19                                 | 0.89 | 1.70 | -         | 0.267            |
|                |      | C        | 100                 | 25    | 757    | 0.05                                 | 0.02 | 0.10 | ↓↓↓       | <b>&lt;0.001</b> |
|                |      | D1       | 4,820               | 1,981 | 13,479 | 1.03                                 | 0.86 | 1.12 | -         | 0.879            |
| D2             |      | 4,754    | 1,142               | 9,498 | 0.87   | 0.57                                 | 1.30 | -    | 0.112     |                  |
| <i>Alpha-7</i> |      | 18       | A                   | 780   | 385    | 4,528                                |      |      |           |                  |
|                | B    |          | 709                 | 410   | 3,643  | 1.00                                 | 0.92 | 1.04 | -         | 0.695            |
|                | C    |          | 735                 | 419   | 3,343  | 0.96                                 | 0.84 | 1.02 | ↓         | <b>0.040</b>     |
|                | 45   | A1       | 637                 | 200   | 3,590  |                                      |      |      |           |                  |
|                |      | A2       | 736                 | 202   | 3,380  | 1.10                                 | 0.98 | 1.30 | -         | 0.223            |
|                |      | A3       | 812                 | 206   | 3,659  | 1.23                                 | 1.01 | 1.36 | ↑         | <b>0.016</b>     |
|                |      | B1       | 804                 | 248   | 3,748  | 1.18                                 | 1.01 | 1.35 | ↑         | <b>0.024</b>     |
|                |      | B2       | 1,449               | 391   | 5,901  | 1.65                                 | 1.41 | 2.31 | ↑         | <b>&lt;0.001</b> |

\* A total of 18 donors were evaluated for each variant.

† Arrows used to indicate direction of difference from reference: -, no significant difference; ↓ or ↑, &lt;2 fold difference from A/A1 reference; ↓↓ or ↑↑, 2-4 fold difference from A/A1 reference; ↓↓↓ or ↑↑↑, &gt;4 fold difference from A/A1 reference. Note the thresholds for a 2-fold increase or decrease compared to the A/A1 reference are 2.0 and 0.5, respectively, and that of a 4-fold increase or decrease compared to the A/A1 reference are 4.0 and 0.25, respectively.
